# Supplementary material for: Examining the Impact of Two Dimensions of Precarious Employment, Vulnerability and Insecurity on the Self-Reported Health of Men, Women and Migrants in Australia
Source: MDPI journal article supplement (doi:10.3390/ijerph17207540), 2020-10-16
Supplement: s1 [file s1]

Supplementary Table 1 PCA analysis of SF1, SF9 and K6 scores

pca sf1 sf9 k6score, mineigen(1.5)  
 Principal components/correlation          Number of obs = 2,655  
                                                                                  Number of comp. = 1  
                                                                                  Trace = 3  
 Rotation: (unrotated = principal)          Rho = 0.5035

| Component | Eigenvalue | Difference | Proportion | Cumulative |
|-----------|------------|------------|------------|------------|
| Comp1     |            |            |            |            |
| Comp2     | 1.51       | 0.68       | 0.50       | 0.50       |
| Comp3     | 0.83       | 0.17       | 0.28       | 0.78       |
|           | 0.66       | .          | 0.22       | 1.00       |

Principal components (eigenvectors)

| Variable | Comp1 | Unexplained |
|----------|-------|-------------|
| sf1      | 0.63  | 0.40        |
| sf9      | 0.56  | 0.53        |
| k6score  | 0.54  | 0.57        |

Supplementary Table 2 Statistically significant associations expressed as incident rate ratios with bias corrected confidence intervals with the overall health

|                           | Incidence Rate Ratio <sup>a</sup><br>(Bias Corrected 95%<br>Confidence Intervals) | p       |
|---------------------------|-----------------------------------------------------------------------------------|---------|
| Vulnerability             | 1.02 (1.02,1.03)                                                                  | <0.0001 |
| Job insecurity            | 1.02 (1.01,1.02)                                                                  | <0.0001 |
| Male                      | 1.00 (Ref)                                                                        |         |
| Female                    | 1.02 (1,1.05)                                                                     | 0.048   |
| Australia                 | 1.00 (Ref)                                                                        |         |
| New Zealand               | 0.95 (0.92,0.98)                                                                  | <0.0001 |
| India                     | 0.92 (0.9,0.95)                                                                   | <0.0001 |
| Philippines               | 0.91 (0.88,0.94)                                                                  | <0.0001 |
| 45 & over                 | 1.00 (Ref)                                                                        |         |
| 18-45 years               | 1.03 (1.01,1.05)                                                                  | 0.005   |
| Self-employed             | 1.00 (Ref)                                                                        |         |
| Work for others part-time | 0.89 (0.85,0.94)                                                                  | <0.0001 |
| Work for others full-time | 0.89 (0.83,0.93)                                                                  | <0.0001 |

|                     |                  |       |
|---------------------|------------------|-------|
|                     | 1.00 (Ref)       |       |
| Fixed Term Contract | 1.06 (1,1.11)    | 0.013 |
| Permanent           | 1.05 (1.02,1.09) | 0.005 |
| _cons               | 11.54            |       |
| /lnalpha            | -5.15            |       |
| alpha               | 0.01             |       |

---

a Model was a negative binomial regression initially adjusted for: vulnerability (entered as a continuous variable) .job insecurity (entered as a continuous variable) sex (male vs female) country or birth (Australia vs New Zealand, India and the Philippines) age (age group 45 plus vs 18-44) area of residence (metro vs rural) education (school only vs trade/TAFE qualification and Tertiary qualification) .job status (self-employed vs work for others part time and work for others full time) contract type (casual versus fixed-term and permanent), company size (up to 19 workers vs 19-200 and 200 or more) weekly hours works (entered as a continuous variable) and occupation (Manager/Professional vs Technician/community services/clerical/sales and Machinery operators/Labourer). For migrant groups only, years resident in Australia. The table displays on the statistically significant associations when sex and country of birth were retained through all iterations.
